# Supplementary material
Source: PubMed Central journal article supplement (PMC4086643)
Supplement: NIHMS564164-supplement-Supp_table_1.pdf [file NIHMS564164-supplement-Supp_table_1.pdf]

Supplementary Table 1.

|                      | Median values (range) |                |               | Median percent change (%) |                 |
|----------------------|-----------------------|----------------|---------------|---------------------------|-----------------|
|                      | Baseline              | C2             | EOS           | Baseline to C2            | Baseline to EOS |
| Total T<br>(ng/dl)   | 14 (7-120)            | 16 (0.3-65)    | 12.5 (7-51)   | 0 (-96-145)               | 5 (-58-64)      |
| Free T<br>(pg/ml)    | 1.2 (0.1-11.8)        | 1.6 (0.2-10)   | 2.1 (0.1-10)  | 0 (-82-85)                | -4 (-90-1567)   |
| Estradiol<br>(pg/ml) | 10 (1-21)             | 10(0-35)       | 10 (2-20)     | 0 (-100-337)              | 0 (-80-150)     |
| SHBG<br>(nM/L)       | 68.5 (26-117)         | 62.0 (7.5-167) | 64.6 (21-154) | -10 (-157-555)            | 0 (-32-97)      |
